# Supplementary material for: Assessment of Oxidative Stress Markers in Hypertensive Patients under the Use of Renin-Angiotensin-Aldosterone Blockers
Source: MDPI journal article supplement (doi:10.3390/antiox12040802), 2023-03-25
Supplement: s1 [file s1]

Table S1. Results of 24-h ambulatory blood pressure monitoring at every hour.

(a) All hypertensive patients.

| Percentile |       | Time (hours) |       |       |       |       |       |       |       |       |       |       |       |       |       |       |       |       |       |       |       |       |       |       |
|------------|-------|--------------|-------|-------|-------|-------|-------|-------|-------|-------|-------|-------|-------|-------|-------|-------|-------|-------|-------|-------|-------|-------|-------|-------|
| <u>SBP</u> | 23h   | 00h          | 01h   | 02h   | 03h   | 04h   | 05h   | 06h   | 07h   | 08h   | 09h   | 10h   | 11h   | 12h   | 13h   | 14h   | 15h   | 16h   | 17h   | 18h   | 19h   | 20h   | 21h   | 22h   |
| <i>p25</i> | 110.0 | 107.5        | 101.4 | 101.3 | 102.8 | 99.9  | 104.0 | 104.0 | 111.3 | 116.7 | 122.0 | 123.0 | 120.5 | 122.0 | 122.6 | 122.5 | 119.1 | 119.5 | 123.3 | 121.4 | 124.6 | 122.0 | 120.2 | 117.8 |
| <i>p50</i> | 117.5 | 115.0        | 112.0 | 111.5 | 112.0 | 113.3 | 114.5 | 114.5 | 121.5 | 129.5 | 134.0 | 132.0 | 130.0 | 129.0 | 130.4 | 128.7 | 128.0 | 129.3 | 131.0 | 129.7 | 133.0 | 129.7 | 129.7 | 125.0 |
| <i>p75</i> | 127.0 | 124.5        | 119.0 | 120.8 | 121.3 | 121.3 | 123.5 | 125.0 | 133.3 | 139.0 | 141.7 | 142.8 | 142.5 | 141.2 | 140.3 | 139.3 | 140.8 | 136.9 | 142.3 | 138.3 | 139.8 | 139.0 | 139.0 | 138.2 |
| <u>DBP</u> |       |              |       |       |       |       |       |       |       |       |       |       |       |       |       |       |       |       |       |       |       |       |       |       |
| <i>p25</i> | 62.5  | 61.4         | 56.5  | 59.0  | 58.8  | 59.0  | 59.8  | 60.1  | 66.3  | 71.3  | 0.0   | 74.0  | 74.5  | 76.6  | 76.7  | 75.5  | 71.8  | 71.5  | 72.9  | 73.2  | 73.0  | 73.9  | 72.1  | 69.7  |
| <i>p50</i> | 69.0  | 66.8         | 64.3  | 64.5  | 65.0  | 66.0  | 67.0  | 67.0  | 72.8  | 81.0  | 75.3  | 83.0  | 82.0  | 84.0  | 82.6  | 81.0  | 80.5  | 81.0  | 81.0  | 81.0  | 82.0  | 81.8  | 81.0  | 77.5  |
| <i>p75</i> | 78.0  | 73.6         | 70.3  | 70.0  | 72.3  | 73.5  | 73.0  | 76.8  | 82.9  | 88.3  | 85.3  | 89.5  | 88.7  | 90.4  | 88.8  | 88.0  | 86.4  | 86.9  | 89.0  | 89.0  | 89.0  | 87.8  | 89.0  | 86.8  |

(b) Patients with morning time use of RAAS blockers.

| Percentile |       | Time (hours) |       |       |       |       |       |       |       |       |       |       |       |       |       |       |       |       |       |       |       |       |       |       |
|------------|-------|--------------|-------|-------|-------|-------|-------|-------|-------|-------|-------|-------|-------|-------|-------|-------|-------|-------|-------|-------|-------|-------|-------|-------|
| <u>SBP</u> | 23h   | 00h          | 01h   | 02h   | 03h   | 04h   | 05h   | 06h   | 07h   | 08h   | 09h   | 10h   | 11h   | 12h   | 13h   | 14h   | 15h   | 16h   | 17h   | 18h   | 19h   | 20h   | 21h   | 22h   |
| p25        | 110.5 | 106.6        | 98.4  | 98.8  | 98.8  | 98.4  | 99.3  | 100.0 | 109.1 | 114.8 | 123.0 | 123.0 | 122.7 | 123.5 | 123.8 | 123.0 | 119.3 | 119.0 | 121.8 | 120.2 | 124.9 | 121.3 | 122.6 | 119.4 |
| p50        | 120.5 | 114.0        | 109.8 | 111.5 | 110.8 | 113.3 | 113.0 | 113.0 | 120.3 | 127.7 | 134.0 | 130.8 | 130.0 | 131.7 | 128.3 | 126.8 | 129.0 | 129.7 | 129.7 | 129.0 | 133.8 | 125.7 | 129.7 | 125.0 |
| p75        | 130.4 | 121.1        | 117.6 | 120.8 | 117.3 | 119.3 | 121.5 | 125.5 | 130.4 | 135.3 | 141.5 | 141.0 | 139.0 | 140.5 | 138.6 | 136.0 | 139.7 | 137.5 | 140.1 | 137.8 | 140.6 | 139.0 | 138.8 | 140.5 |
| <u>DBP</u> |       |              |       |       |       |       |       |       |       |       |       |       |       |       |       |       |       |       |       |       |       |       |       |       |
| p25        | 65.1  | 61.9         | 56.5  | 57.5  | 58.5  | 59.3  | 59.8  | 59.8  | 66.4  | 74.8  | 0.0   | 77.0  | 80.0  | 81.9  | 78.4  | 78.3  | 73.8  | 73.5  | 74.2  | 75.7  | 77.1  | 77.3  | 73.2  | 71.3  |
| p50        | 73.8  | 66.0         | 64.0  | 62.8  | 64.3  | 66.3  | 65.5  | 67.0  | 77.0  | 82.5  | 73.0  | 85.0  | 86.0  | 86.0  | 84.3  | 81.4  | 80.8  | 83.9  | 80.9  | 81.0  | 85.2  | 83.0  | 85.0  | 81.0  |
| p75        | 83.3  | 73.6         | 70.3  | 69.6  | 70.5  | 77.6  | 75.5  | 81.8  | 84.8  | 88.3  | 85.3  | 91.3  | 89.0  | 92.5  | 88.7  | 89.1  | 86.8  | 89.4  | 89.3  | 89.7  | 90.9  | 89.3  | 90.0  | 89.5  |

(c) Patients with bedtime time use of RAAS blockers.

| Percentile |       | Time (hours) |       |       |       |       |       |       |       |       |       |       |       |       |       |       |       |       |       |       |       |       |       |       |
|------------|-------|--------------|-------|-------|-------|-------|-------|-------|-------|-------|-------|-------|-------|-------|-------|-------|-------|-------|-------|-------|-------|-------|-------|-------|
| <u>SBP</u> | 23h   | 00h          | 01h   | 02h   | 03h   | 04h   | 05h   | 06h   | 07h   | 08h   | 09h   | 10h   | 11h   | 12h   | 13h   | 14h   | 15h   | 16h   | 17h   | 18h   | 19h   | 20h   | 21h   | 22h   |
| p25        | 110.0 | 108.1        | 108.3 | 102.5 | 104.0 | 103.1 | 107.8 | 110.0 | 112.1 | 118.0 | 122.0 | 122.0 | 120.1 | 119.3 | 121.2 | 122.0 | 118.7 | 118.6 | 124.0 | 121.3 | 122.0 | 123.0 | 118.4 | 116.3 |
| p50        | 114.0 | 117.0        | 112.5 | 112.0 | 113.5 | 113.5 | 118.8 | 119.0 | 121.5 | 133.0 | 133.5 | 132.5 | 130.3 | 128.5 | 131.8 | 129.3 | 127.0 | 128.3 | 133.0 | 130.0 | 132.0 | 132.0 | 129.0 | 124.7 |
| p75        | 123.0 | 129.4        | 119.0 | 121.0 | 123.5 | 122.0 | 125.6 | 125.0 | 135.5 | 144.8 | 145.5 | 146.1 | 145.0 | 142.3 | 145.3 | 142.7 | 145.3 | 137.3 | 144.5 | 141.3 | 139.3 | 146.0 | 140.5 | 137.0 |
| <u>DBP</u> |       |              |       |       |       |       |       |       |       |       |       |       |       |       |       |       |       |       |       |       |       |       |       |       |
| p25        | 59.0  | 60.3         | 56.8  | 60.0  | 59.0  | 59.0  | 60.1  | 60.5  | 66.3  | 68.7  | 0.0   | 73.6  | 70.5  | 74.3  | 74.4  | 68.7  | 67.7  | 68.3  | 68.7  | 68.0  | 69.3  | 72.7  | 71.1  | 69.7  |
| p50        | 66.0  | 67.0         | 65.3  | 67.0  | 66.0  | 65.8  | 68.0  | 67.0  | 72.2  | 80.1  | 77.0  | 81.7  | 80.5  | 81.0  | 81.3  | 80.0  | 79.7  | 80.2  | 82.0  | 80.0  | 80.0  | 81.0  | 77.2  | 74.0  |
| p75        | 73.0  | 74.1         | 70.8  | 70.0  | 72.5  | 72.8  | 72.8  | 73.0  | 76.5  | 88.5  | 85.5  | 87.5  | 86.3  | 89.0  | 88.8  | 87.0  | 86.5  | 84.1  | 87.3  | 87.0  | 87.0  | 86.0  | 86.8  | 84.0  |
